# Supplementary material for: TG-interacting factor 1 (Tgif1)-deficiency attenuates bone remodeling and blunts the anabolic response to parathyroid hormone
Source: PubMed Central journal article supplement (PMC6430773; doi:10.1038/s41467-019-08778-x), 2019-03-22
Supplement: 41467_2019_8778_MOESM1_ESM.pdf [file 41467_2019_8778_MOESM1_ESM.pdf]

**Supplementary information**

**TG-interacting factor 1 (Tgif1)-deficiency attenuates bone remodeling and blunts the anabolic response to parathyroid hormone**

**Saito et al.**

## Supplementary Figure 1

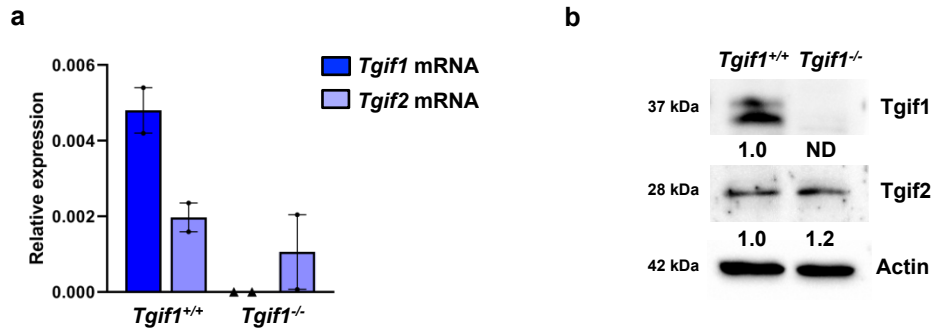

**Supplementary Fig. 1** TG-interacting factor 2 (Tgif2) expression is unchanged in the absence of TG-interacting factor 1 (Tgif1). **a** Relative expression of *Tgif1* and *Tgif2* mRNA in calvarial osteoblasts obtained from *Tgif1*<sup>+/+</sup> and *Tgif1*<sup>-/-</sup> mice. (*Tgif1*<sup>+/+</sup> N = 2, *Tgif1*<sup>-/-</sup> N = 2). **b** Immunoblot of Tgif1 and Tgif2 protein expression in calvarial osteoblasts obtained from *Tgif1*<sup>+/+</sup> and *Tgif1*<sup>-/-</sup> mice. Immunoblot for Actin was used as a loading control. Normalized fold expression and molecular weight in kilo Dalton (kDa) are indicated (representative image of 2 experiments), ND = non-detectable

Supplementary Figure 2

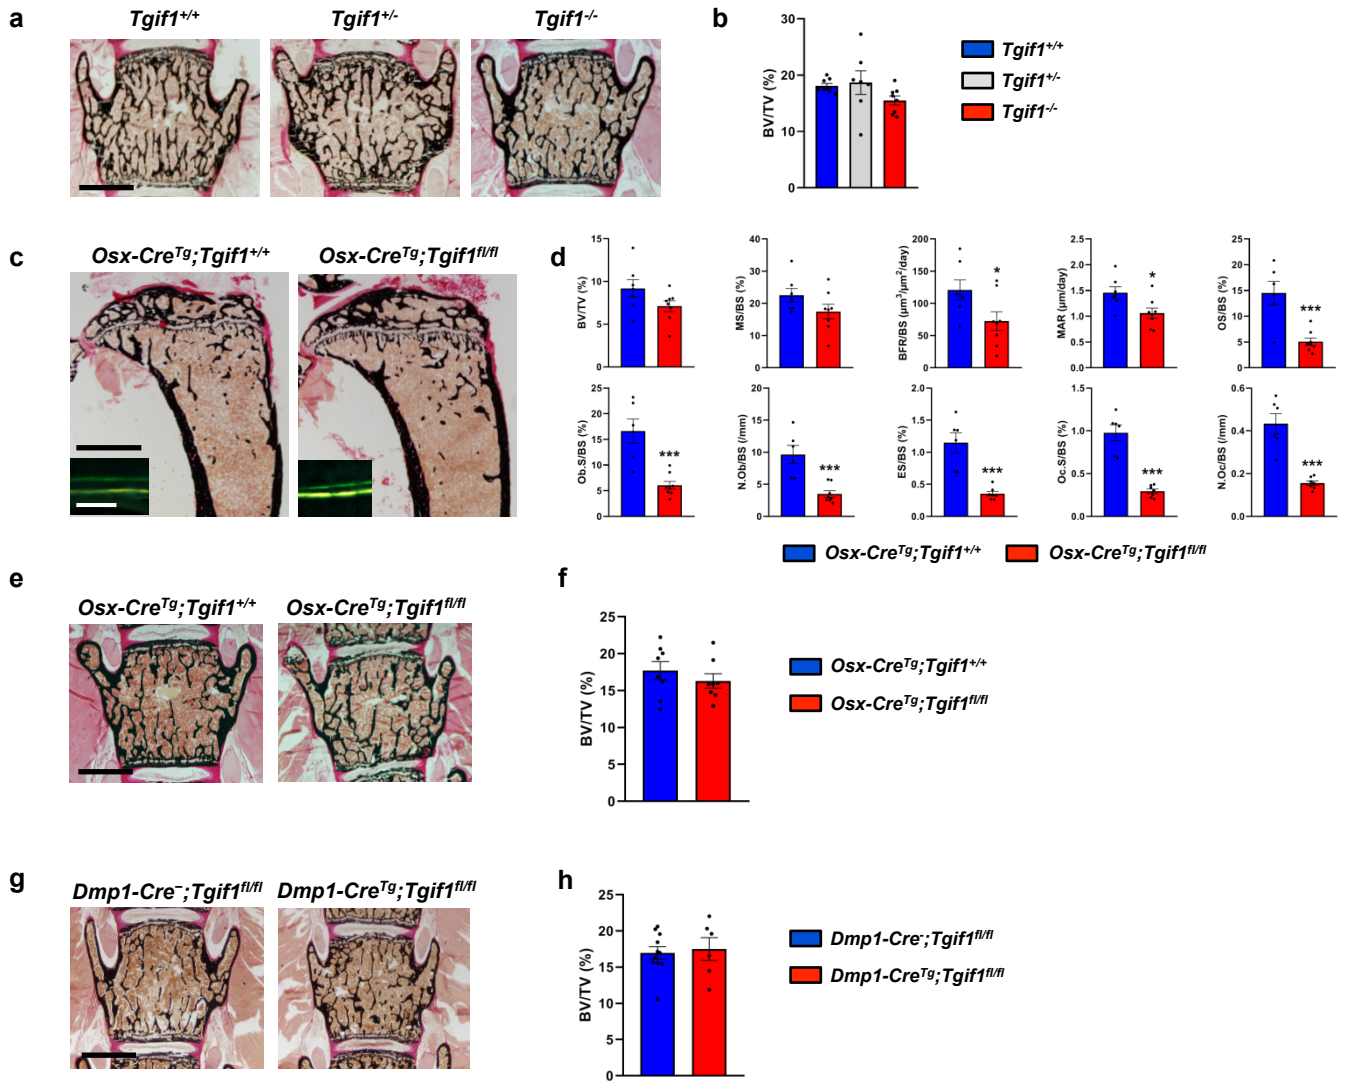

**Supplementary Fig. 2** TG-interacting factor 1 (*Tgif1*)-deficiency in osteoblasts attenuates bone remodeling. **a** Representative images of the fourth lumbar vertebrae of 8-week-old male mice with the genotypes *Tgif1*<sup>+/+</sup>, *Tgif1*<sup>+/-</sup> and *Tgif1*<sup>-/-</sup> after von Kossa staining. **b** Histomorphometric quantification of the bone mass (BV/TV, bone volume/tissue volume) of the fourth lumbar vertebrae of 8-week-old male mice with the genotypes *Tgif1*<sup>+/+</sup>, *Tgif1*<sup>+/-</sup> and *Tgif1*<sup>-/-</sup> (N = 9, 7 and 8). **c** Representative images of the proximal tibiae of 8-week-old male mice of the genotypes *Osx-Cre*<sup>Tg</sup>;*Tgif1*<sup>+/+</sup> and *Osx-Cre*<sup>Tg</sup>;*Tgif1*<sup>fl/fl</sup>, i.e. deletion of the *Tgif1* gene in osteoblasts of early differentiation stages, after von Kossa staining and fluorescence double labeling to visualize bone formation (insets). **d** Histomorphometric analysis of the proximal tibiae of 8-week-old male mice with the genotypes *Osx-Cre*<sup>Tg</sup>;*Tgif1*<sup>+/+</sup> and *Osx-Cre*<sup>Tg</sup>;*Tgif1*<sup>fl/fl</sup> (N = 7, 8). For abbreviations see the legend to Fig. 1. \*p < 0.05, \*\*\*p < 0.001 vs. *Osx-Cre*<sup>Tg</sup>;*Tgif1*<sup>+/+</sup>. **e** Representative images of the fourth lumbar vertebrae of 8-week-old male mice with the genotypes *Osx-Cre*<sup>Tg</sup>;*Tgif1*<sup>+/+</sup> and *Osx-Cre*<sup>Tg</sup>;*Tgif1*<sup>fl/fl</sup> after von Kossa staining. **f** Histomorphometric quantification of the BV/TV of the fourth lumbar vertebrae of 8-week-old male mice with the genotypes *Osx-Cre*<sup>Tg</sup>;*Tgif1*<sup>+/+</sup> and *Osx-Cre*<sup>Tg</sup>;*Tgif1*<sup>fl/fl</sup> (N = 8, 8). **g** Representative images of the fourth lumbar vertebrae of 8-week-old male mice with the genotypes *Dmp1-Cre*<sup>-</sup>;*Tgif1*<sup>fl/fl</sup> and *Dmp1-Cre*<sup>Tg</sup>;*Tgif1*<sup>fl/fl</sup>, i.e. deletion of the *Tgif1* gene in mature osteoblasts and osteocytes, after von Kossa staining. **h** Histomorphometric quantification of the BV/TV of the fourth lumbar vertebrae of 8-week-old male mice with the genotypes *Dmp1-Cre*<sup>-</sup>;*Tgif1*<sup>fl/fl</sup> and *Dmp1-Cre*<sup>Tg</sup>;*Tgif1*<sup>fl/fl</sup> (N = 11, 6). Scale bars indicate 1 mm **a**, **e**, **g**, and 1 mm (black) and 50 μm (white) **c**. Error bars represent the s.e.m. Two-tailed Student's t-test was used to compare two groups **d**, **f**, **h**, and analysis of variance (ANOVA) followed by Newman-Keuls post-hoc analysis was used to compare three groups **b**

Supplementary Figure 3

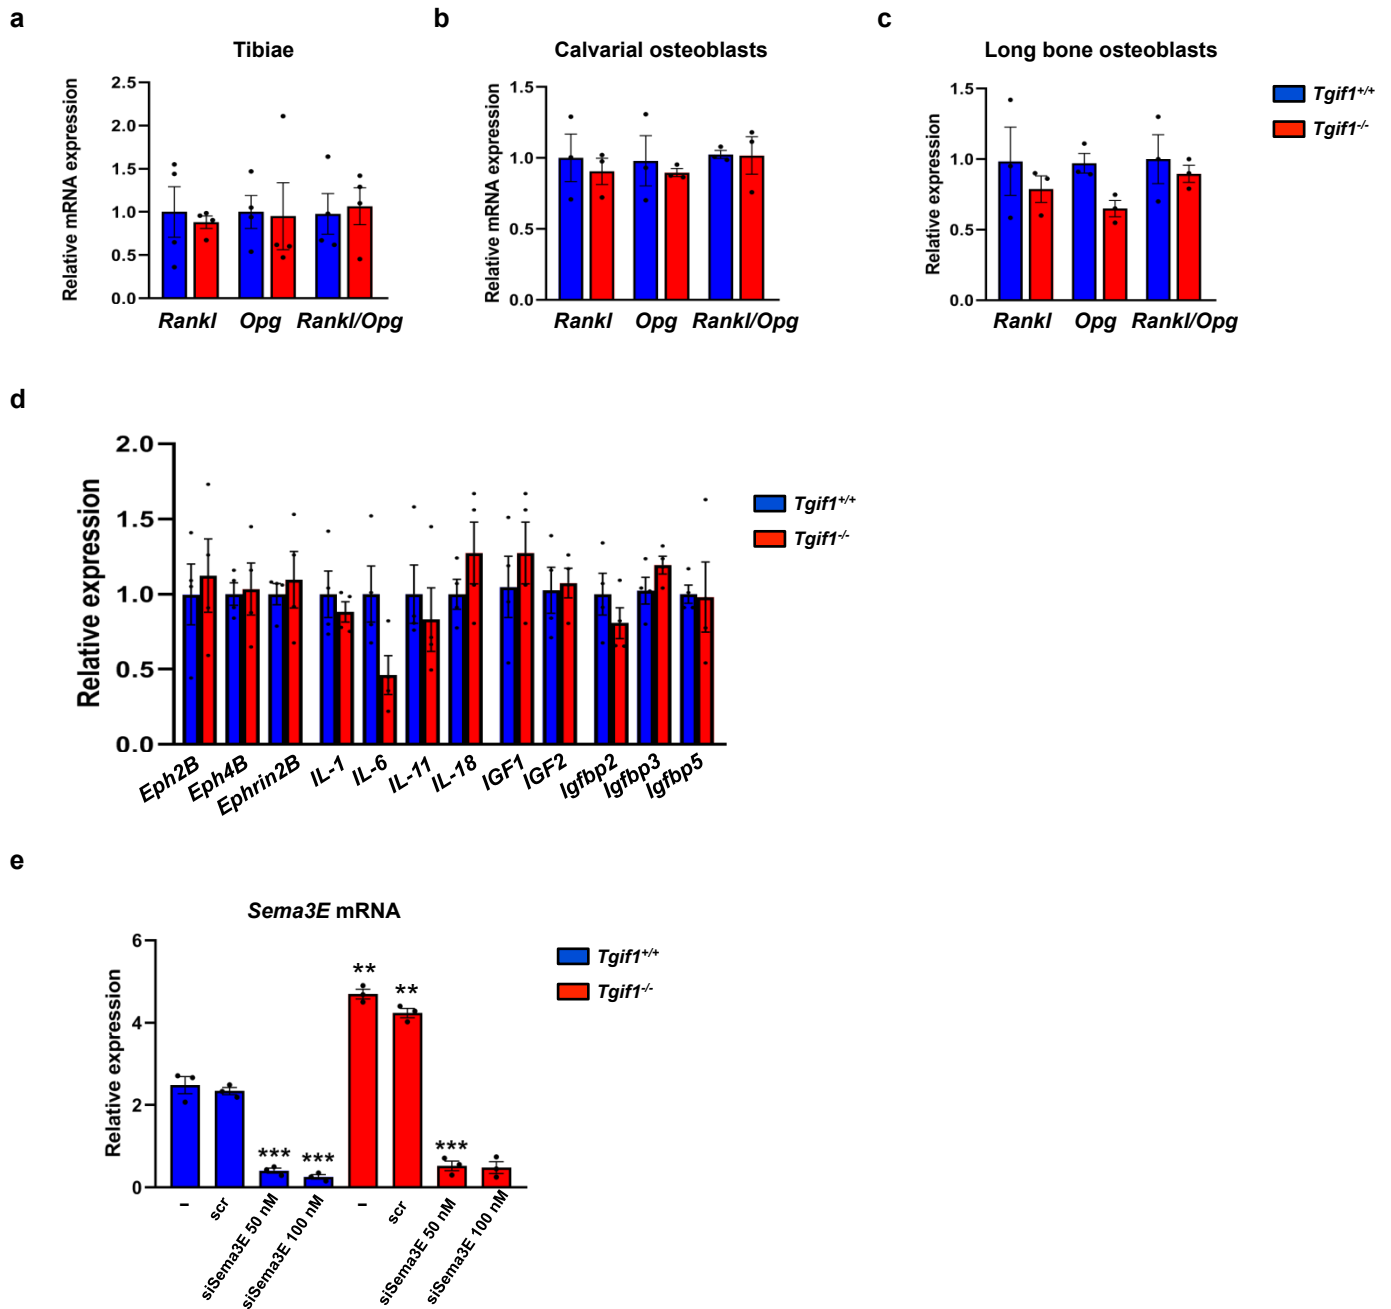

**Supplementary Fig. 3** *Semaphorin 3E* (*Sema3E*) expression is increased in *TG*-interacting factor 1 (*Tgif1*)-deficient osteoblasts and suppressed by siRNA. Relative *Rankl* and *Opg* mRNA expression and the calculated *Rankl/Opg* ratio in **a** tibiae, **b** calvarial osteoblasts and **c** long bone osteoblasts obtained from *Tgif1*<sup>+/+</sup> and *Tgif1*<sup>-/-</sup> mice (N = 4, 4). **d** Relative mRNA expression of indicated genes in long bone osteoblasts isolated from *Tgif1*<sup>+/+</sup> and *Tgif1*<sup>-/-</sup> mice (N = 4, 4). **e** Relative *Sema3E* mRNA expression in long bone osteoblasts isolated from *Tgif1*<sup>+/+</sup> and *Tgif1*<sup>-/-</sup> mice 24 hours after transfection with *Sema3E* siRNA (siSema3E) or scrambled (scr) control siRNA at a final concentration of 50 nM or 100 nM (N = 3). \*\*p<0.01, \*\*\*p<0.001 vs. *Tgif1*<sup>+/+</sup> scr. Error bars represent the s.e.m. Two-tailed Student's t-test was used to compare two groups **a-d**, and analysis of variance (ANOVA) followed by Newman-Keuls post-hoc analysis was used to compare more than two groups **e**

Supplementary Figure 4

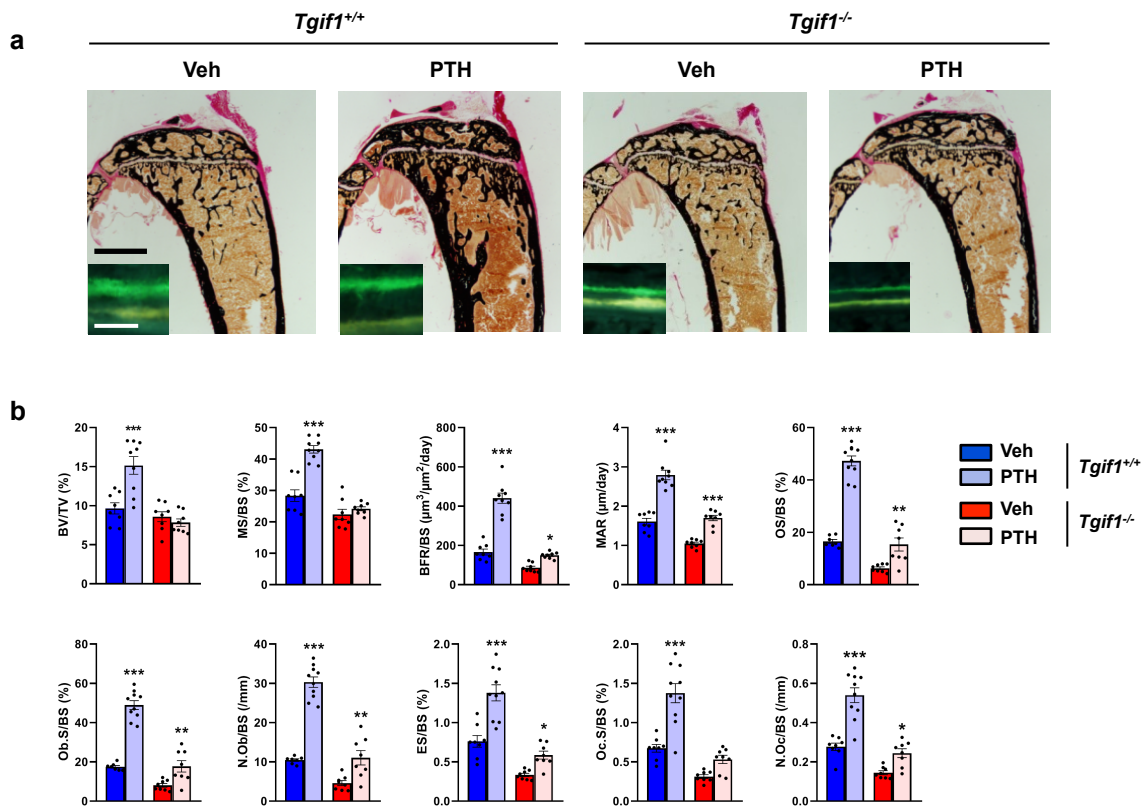

**Supplementary Fig. 4** Deletion of TG-interacting factor 1 (*Tgif1*) blunts the bone anabolic effect of Parathyroid hormone (PTH) treatment. **a** Representative images of the proximal tibiae of 12-week-old *Tgif1<sup>+/+</sup>* and *Tgif1<sup>-/-</sup>* male mice after von Kossa staining and fluorescence double labeling to visualize bone formation (insets). *Tgif1<sup>+/+</sup>* and *Tgif1<sup>-/-</sup>* mice were treated with PTH or vehicle (Veh) for 4 weeks. Scale bars indicate 1 mm (black) and 50 µm (white). **b** Histomorphometric analysis of the trabecular bone in proximal tibiae of 12-week-old male *Tgif1<sup>+/+</sup>* and *Tgif1<sup>-/-</sup>* mice after treatment with PTH or Veh (*Tgif1<sup>+/+</sup>*+Veh: N = 8, *Tgif1<sup>+/+</sup>*+PTH: N = 9, *Tgif1<sup>-/-</sup>*+Veh: N = 8, *Tgif1<sup>-/-</sup>*+PTH: N = 8). For abbreviations see the legend to Fig. 1. \**p*<0.05, \*\**p*<0.01, \*\*\**p*<0.001 vs. Veh of the same genotype. Error bars represent the s.e.m. Statistical analysis was performed using analysis of variance (ANOVA) followed by Newman-Keuls post-hoc test

Supplementary Figure 5

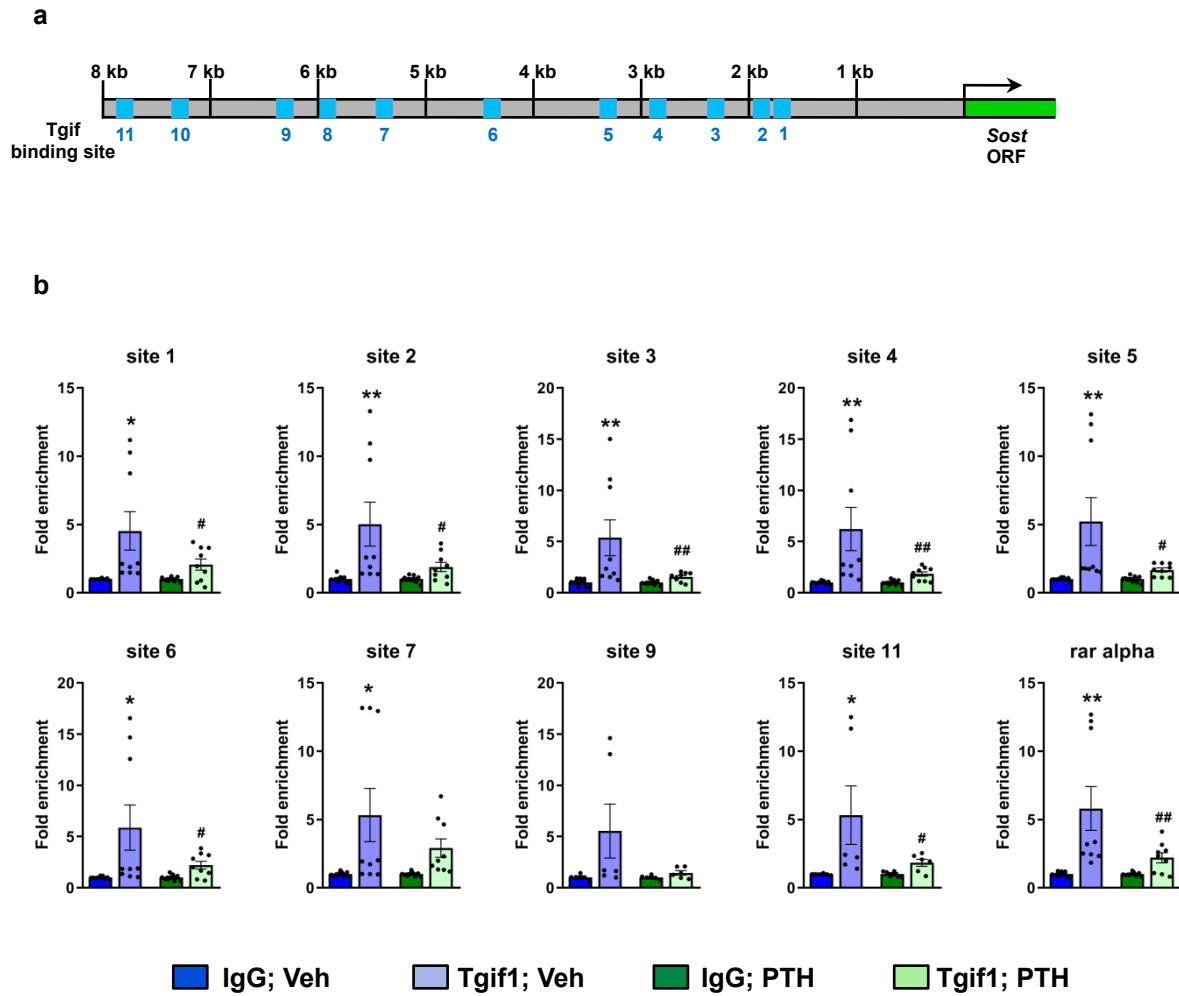

**Supplementary Fig. 5** TG-interacting factor 1 (Tgif1) interacts with the *Sost* promoter and dissociates upon parathyroid hormone (PTH) stimulation. **a** Schematic of the 8 kb region of the *Sost* promoter upstream of the open reading frame (ORF) with 11 putative Tgif (Tgif1 and Tgif2) binding sites (marked in blue). **(b)** Chromatin-Immunoprecipitation (ChIP) was used to determine the fold enrichment of Tgif1 at the indicated sites of the *Sost* promoter in Ocy454 cells upon stimulation with PTH or vehicle (Veh) (N = 3). ChIP using an antibody against immunoglobulin G (IgG) was used as negative control and ChIP of Tgif1 with the *Rar alpha* promoter served as positive control. \*p<0.05, \*\*p<0.01 vs. IgG; Veh, #p<0.05, ##p<0.05 vs. Tgif1; Veh. Error bars represent the s.e.m. Statistical analysis was performed using analysis of variance (ANOVA) followed by Newman-Keuls post-hoc test

Supplementary Figure 6

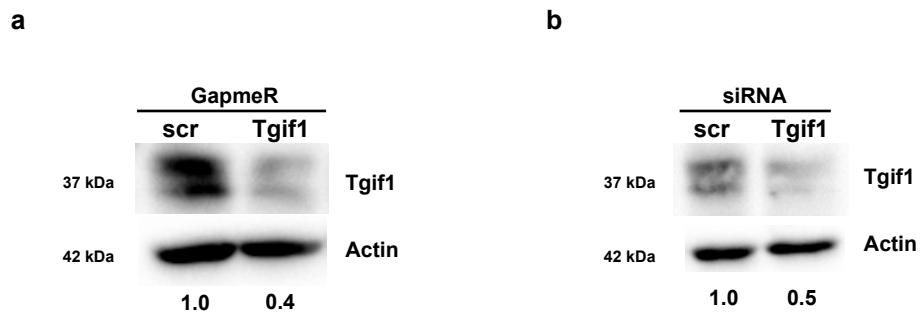

**Supplementary Fig. 6** Silencing of TG-interacting factor 1 (Tgif1). **a** Immunoblot of Tgif1 protein expression in UMR-106 cells 48 hours after transfection with scrambled (scr) control GapmeR or GapmeR targeting Tgif1 or **b** with scr siRNA or siRNA targeting Tgif1. Immunoblot for Actin was used as a loading control. Normalized fold expression and molecular weight in kilo Dalton (kDa) are indicated (representative images of 3 experiments)

Supplementary Table 1. Histomorphometric analysis of the proximal tibiae and vertebrae of *Tgif1*<sup>+/+</sup>, *Tgif1*<sup>+/-</sup> and *Tgif1*<sup>-/-</sup> male mice

|                | Parameters                                      | Male                        |                                    |                                        |
|----------------|-------------------------------------------------|-----------------------------|------------------------------------|----------------------------------------|
|                |                                                 | <i>Tgif1</i> <sup>+/+</sup> | <i>Tgif1</i> <sup>+/-</sup>        | <i>Tgif1</i> <sup>-/-</sup>            |
| Proximal tibia | BV/TV (%)                                       | 8.666 ± 0.683 (n=9)         | 9.228 ± 0.780 (n=6)                | 7.527 ± 0.726 (n=7)                    |
|                | Tb.Th (µm)                                      | 28.49 ± 2.63 (n=9)          | 32.36 ± 2.32 (n=6)                 | 29.96 ± 1.02 (n=7)                     |
|                | Tb.Sp (µm)                                      | 277.6 ± 45.2 (n=9)          | 328.2 ± 33.1 (n=6)                 | 360.0 ± 49.1 (n=7)                     |
|                | Tb.N (1/mm)                                     | 3.184 ± 0.461 (n=8)         | 2.892 ± 0.254 (n=6)                | 2.584 ± 0.238 (n=7)                    |
|                | MS/BS (%)                                       | 16.62 ± 3.41 (n=9)          | 18.02 ± 2.54 (n=5)                 | 9.659 ± 3.376 (n=7)                    |
|                | MAR (µm/day)                                    | 1.693 ± 0.143 (n=9)         | 1.687 ± 0.186 (n=5)                | 0.957 ± 0.143 <sup>***##</sup> (n=7)   |
|                | BFR/BS (µm <sup>3</sup> /µm <sup>2</sup> /year) | 105.4 ± 21.1 (n=9)          | 109.4 ± 14.9 (n=5)                 | 34.66 ± 12.2 <sup>#</sup> (n=7)        |
|                | BFR/BV (%/year)                                 | 589.4 ± 123.5 (n=9)         | 588.5 ± 88.7 (n=5)                 | 183.0 ± 60.6 <sup>*</sup> (n=7)        |
|                | OV/BV (%)                                       | 1.972 ± 0.207 (n=10)        | 1.910 ± 0.244 (n=6)                | 0.984 ± 0.202 <sup>***#</sup> (n=8)    |
|                | OS/BS (%)                                       | 15.15 ± 0.80 (n=10)         | 12.34 ± 1.73 (n=6)                 | 6.15 ± 0.74 <sup>****###</sup> (n=8)   |
|                | Ob.S/BS (%)                                     | 17.85 ± 0.85 (n=10)         | 13.94 ± 1.98 (n=6)                 | 7.91 ± 1.36 <sup>****###</sup> (n=8)   |
|                | N.Ob/BS (1/mm)                                  | 10.67 ± 0.60 (n=10)         | 8.03 ± 1.12 <sup>*</sup> (n=6)     | 4.71 ± 0.71 <sup>****#</sup> (n=8)     |
|                | ES/BS (%)                                       | 0.9010 ± 0.0896 (n=10)      | 0.6667 ± 0.0919 (n=6)              | 0.3525 ± 0.0568 <sup>****#</sup> (n=8) |
|                | Oc.S/BS (%)                                     | 0.7910 ± 0.0690 (n=10)      | 0.5450 ± 0.0681 <sup>*</sup> (n=6) | 0.3188 ± 0.0396 <sup>****#</sup> (n=8) |
|                | N.Oc/BS (1/mm)                                  | 0.3550 ± 0.0300 (n=10)      | 0.2567 ± 0.0232 <sup>*</sup> (n=6) | 0.1688 ± 0.0245 <sup>***</sup> (n=8)   |
| Vertebral body | BV/TV (%)                                       | 18.93 ± 0.90 (n=9)          | 18.68 ± 2.09 (n=7)                 | 15.50 ± 0.81 (n=8)                     |
|                | Tb.Th (µm)                                      | 39.29 ± 0.90 (n=9)          | 38.60 ± 2.09 (n=7)                 | 35.52 ± 1.10 (n=8)                     |
|                | Tb.Sp (µm)                                      | 169.1 ± 3.9 (n=9)           | 177.7 ± 18.4 (n=7)                 | 195.9 ± 7.9 (n=8)                      |
|                | Tb.N (1/mm)                                     | 4.806 ± 0.070 (n=8)         | 4.757 ± 0.295 (n=11)               | 4.353 ± 0.140 (n=8)                    |

Histomorphometry of the proximal tibiae and the L4 vertebral bodies of 8-week old mice. Mean values ± SEM. \*p<0.05, \*\*p<0.01, \*\*\*p<0.001 vs. *Tgif1*<sup>+/+</sup>, #p<0.05, ##p<0.01, ###p<0.001 vs. *Tgif1*<sup>+/-</sup>.



Supplementary Table 2. Histomorphometric analysis of the proximal tibiae and vertebrae of *Tgif1*<sup>+/+</sup>, *Tgif1*<sup>+/-</sup> and *Tgif1*<sup>-/-</sup> female mice

| Parameters     | Female                                          |                             |                             |                                       |
|----------------|-------------------------------------------------|-----------------------------|-----------------------------|---------------------------------------|
|                | <i>Tgif1</i> <sup>+/+</sup>                     | <i>Tgif1</i> <sup>+/-</sup> | <i>Tgif1</i> <sup>-/-</sup> |                                       |
| Proximal tibia | BV/TV (%)                                       | 5.321 ± 0.764 (n=7)         | 5.540 ± 0.546 (n=8)         | 5.224 ± 0.466 (n=7)                   |
|                | Tb.Th (µm)                                      | 31.52 ± 2.20 (n=7)          | 27.57 ± 1.52 (n=8)          | 28.09 ± 2.68 (n=7)                    |
|                | Tb.Sp (µm)                                      | 592.8 ± 63.1 (n=7)          | 495.5 ± 45.1 (n=8)          | 547.0 ± 82.9 (n=7)                    |
|                | Tb.N (1/mm)                                     | 1.626 ± 0.170 (n=7)         | 1.993 ± 0.139 (n=8)         | 2.059 ± 0.408 (n=8)                   |
|                | MS/BS (%)                                       | 23.16 ± 3.81 (n=7)          | 14.97 ± 0.88 (n=7)          | 15.31 ± 2.82 (n=7)                    |
|                | MAR (µm/day)                                    | 1.942 ± 0.070 (n=7)         | 1.607 ± 0.120 (n=7)         | 1.019 ± 0.178*** <sup>#</sup> (n=7)   |
|                | BFR/BS (µm <sup>3</sup> /µm <sup>2</sup> /year) | 159.6 ± 23.4 (n=7)          | 87.78 ± 8.02* (n=7)         | 59.57 ± 12.85*** (n=7)                |
|                | BFR/BV (%/year)                                 | 837.1 ± 109.3 (n=7)         | 507.8 ± 52.6* (n=7)         | 340.7 ± 69.9** (n=7)                  |
|                | OV/BV (%)                                       | 3.169 ± 0.490 (n=7)         | 4.223 ± 0.797 (n=8)         | 1.887 ± 0.566 <sup>#</sup> (n=7)      |
|                | OS/BS (%)                                       | 21.13 ± 1.37 (n=7)          | 20.90 ± 2.65 (n=8)          | 10.38 ± 2.21*** <sup>##</sup> (n=7)   |
|                | Ob.S/BS (%)                                     | 23.16 ± 1.23 (n=7)          | 26.04 ± 2.18 (n=8)          | 10.85 ± 1.24*** <sup>###</sup> (n=7)  |
|                | N.Ob/BS (1/mm)                                  | 13.34 ± 0.80 (n=7)          | 15.80 ± 1.29* (n=8)         | 6.51 ± 1.48*** <sup>####</sup> (n=7)  |
|                | ES/BS (%)                                       | 1.183 ± 0.117 (n=7)         | 0.9363 ± 0.139 (n=8)        | 0.4400 ± 0.0628*** <sup>#</sup> (n=7) |
|                | Oc.S/BS (%)                                     | 1.104 ± 0.144 (n=7)         | 0.7688 ± 0.1139 (n=8)       | 0.3686 ± 0.0639*** (n=7)              |
|                | N.Oc/BS (1/mm)                                  | 0.5157 ± 0.0395 (n=7)       | 0.3563 ± 0.0479 (n=8)       | 0.2543 ± 0.0542** (n=7)               |
| Vertebral body | BV/TV (%)                                       | 14.37 ± 2.96 (n=3)          | 11.68 ± 1.15 (n=8)          | 11.42 ± 3.43 (n=4)                    |
|                | Tb.Th (µm)                                      | 38.39 ± 2.49 (n=3)          | 33.57 ± 1.65 (n=8)          | 34.89 ± 4.07 (n=4)                    |
|                | Tb.Sp (µm)                                      | 244.6 ± 41.5 (n=3)          | 264.5 ± 18.2 (n=8)          | 309.9 ± 49.6 (n=4)                    |
|                | Tb.N (1/mm)                                     | 3.676 ± 0.522 (n=3)         | 3.425 ± 0.179 (n=8)         | 3.111 ± 0.528 (n=4)                   |

Histomorphometry of the proximal tibiae and the L4 vertebral bodies of 8-week old mice. Mean values ± SEM. \*p<0.05, \*\*p<0.01, \*\*\*p<0.001 vs. *Tgif1*<sup>+/+</sup>, #p<0.05, ##p<0.01, ###p<0.001 vs. *Tgif1*<sup>+/-</sup>.

Supplementary Table 3. Histomorphometric analysis of the proximal tibiae and vertebrae of *Osx-Cre<sup>Tg</sup>;Tgif1<sup>+/+</sup>* and *Osx-Cre<sup>Tg</sup>;Tgif1<sup>fl/fl</sup>* male mice

|                |                                                 | Male                                            |                                                   |
|----------------|-------------------------------------------------|-------------------------------------------------|---------------------------------------------------|
| Parameters     |                                                 | <i>Osx-Cre<sup>Tg</sup>;Tgif1<sup>+/+</sup></i> | <i>Osx-Cre<sup>Tg</sup>;Tgif1<sup>fl/fl</sup></i> |
| Proximal tibia | BV/TV (%)                                       | 9.178 ± 1.03 (n=7)                              | 7.109 ± 0.63 (n=8)                                |
|                | Tb.Th (µm)                                      | 33.31 ± 0.90 (n=7)                              | 31.40 ± 1.03 (n=8)                                |
|                | Tb.Sp (µm)                                      | 361.5 ± 54.0 (n=7)                              | 438.7 ± 49.4 (n=8)                                |
|                | Tb.N (1/mm)                                     | 2.770 ± 0.306 (n=7)                             | 2.256 ± 0.181 (n=8)                               |
|                | MS/BS (%)                                       | 22.51 ± 2.09 (n=7)                              | 17.49 ± 2.23 (n=8)                                |
|                | MAR (µm/day)                                    | 1.457 ± 0.113 (n=7)                             | 1.059 ± 0.100* (n=8)                              |
|                | BFR/BS (µm <sup>3</sup> /µm <sup>2</sup> /year) | 120.9 ± 15.6 (n=7)                              | 72.44 ± 14.6* (n=8)                               |
|                | BFR/BV (%/year)                                 | 718.6 ± 79.6 (n=7)                              | 467.4 ± 97.4 (n=8)                                |
|                | OV/BV (%)                                       | 1.892 ± 0.384 (n=6)                             | 0.591 ± 0.010** (n=8)                             |
|                | OS/BS (%)                                       | 14.52 ± 2.28 (n=6)                              | 5.063 ± 0.713*** (n=8)                            |
|                | Ob.S/BS (%)                                     | 16.62 ± 2.34 (n=6)                              | 6.044 ± 0.768*** (n=8)                            |
|                | N.Ob/BS (1/mm)                                  | 9.648 ± 1.407 (n=6)                             | 3.484 ± 0.509*** (n=8)                            |
|                | ES/BS (%)                                       | 1.149 ± 0.155 (n=6)                             | 0.432 ± 0.083*** (n=8)                            |
|                | Oc.S/BS (%)                                     | 0.9764 ± 0.0936 (n=6)                           | 0.3671 ± 0.0780*** (n=8)                          |
|                | N.Oc/BS (1/mm)                                  | 0.4335 ± 0.0472 (n=6)                           | 0.1864 ± 0.0325*** (n=8)                          |
| Vertebral body | BV/TV (%)                                       | 17.69 ± 1.23 (n=8)                              | 16.30 ± 0.97 (n=8)                                |
|                | Tb.Th (µm)                                      | 36.00 ± 1.49 (n=8)                              | 36.17 ± 1.04 (n=8)                                |
|                | Tb.Sp (µm)                                      | 172.3 ± 11.8 (n=8)                              | 189.1 ± 10.1 (n=8)                                |
|                | Tb.N (1/mm)                                     | 4.908 ± 0.277 (n=8)                             | 4.493 ± 0.182 (n=11)                              |

Histomorphometry of the proximal tibiae and the L4 vertebral bodies of 8-week old mice. Mean values ± SEM. \*p<0.05, \*\*p<0.01, \*\*\*p<0.001 vs. *Osx-Cre<sup>Tg</sup>;Tgif1<sup>+/+</sup>*.

Supplementary Table 4. Histomorphometric analysis of the proximal tibiae and vertebrae of *Dmp1-Cre<sup>-/-</sup>;Tgif1<sup>fl/fl</sup>* and *Dmp1-Cre<sup>Tg</sup>;Tgif1<sup>fl/fl</sup>* male mice

|                | Parameters                                      | Male                                                |                                                    |
|----------------|-------------------------------------------------|-----------------------------------------------------|----------------------------------------------------|
|                |                                                 | <i>Dmp1-Cre<sup>-/-</sup>;Tgif1<sup>fl/fl</sup></i> | <i>Dmp1-Cre<sup>Tg</sup>;Tgif1<sup>fl/fl</sup></i> |
| Proximal tibia | BV/TV (%)                                       | 5.761 ± 0.825 (n=9)                                 | 6.176 ± 0.680 (n=8)                                |
|                | Tb.Th (µm)                                      | 25.60 ± 1.31 (n=9)                                  | 26.62 ± 2.02 (n=8)                                 |
|                | Tb.Sp (µm)                                      | 503.2 ± 79.0 (n=9)                                  | 443.5 ± 64.6 (n=8)                                 |
|                | Tb.N (1/mm)                                     | 2.283 ± 0.340 (n=9)                                 | 2.353 ± 0.245 (n=8)                                |
|                | MS/BS (%)                                       | 27.77 ± 0.87 (n=9)                                  | 20.71 ± 1.26*** (n=8)                              |
|                | MAR (µm/day)                                    | 1.924 ± 0.101 (n=9)                                 | 1.092 ± 0.037*** (n=8)                             |
|                | BFR/BS (µm <sup>3</sup> /µm <sup>2</sup> /year) | 194.8 ± 11,2 (n=9)                                  | 82.25 ± 5.02*** (n=8)                              |
|                | BFR/BV (%/year)                                 | 1123.0 ± 83.3 (n=9)                                 | 487.5 ± 35.2*** (n=8)                              |
|                | OV/BV (%)                                       | 2.762 ± 0.205 (n=8)                                 | 0.870 ± 0.335*** (n=6)                             |
|                | OS/BS (%)                                       | 16.87 ± 1.34 (n=8)                                  | 6.474 ± 2.267** (n=6)                              |
|                | Ob.S/BS (%)                                     | 17.63 ± 1.26 (n=8)                                  | 7.769 ± 2.853** (n=6)                              |
|                | N.Ob/BS (1/mm)                                  | 11.55 ± 0.77 (n=8)                                  | 5.206 ± 1.780** (n=6)                              |
|                | ES/BS (%)                                       | 0.9783 ± 0.0674 (n=8)                               | 0.4811 ± 0.0685*** (n=6)                           |
|                | Oc.S/BS (%)                                     | 0.8966 ± 0.0554 (n=8)                               | 0.4913 ± 0.0852** (n=6)                            |
|                | N.Oc/BS (1/mm)                                  | 0.3684 ± 0.0264 (n=8)                               | 0.2160 ± 0.0382** (n=6)                            |
| Vertebral body | BV/TV (%)                                       | 17.54 ± 1.12 (n=18)                                 | 18.13 ± 2.01 (n=9)                                 |
|                | Tb.Th (µm)                                      | 30.53 ± 1.52 (n=18)                                 | 28.56 ± 2.53 (n=9)                                 |
|                | Tb.Sp (µm)                                      | 149.9 ± 8.7 (n=18)                                  | 189.1 ± 10.1 (n=9)                                 |
|                | Tb.N (1/mm)                                     | 5.728 ± 0.239 (n=18)                                | 6.250 ± 0.361 (n=9)                                |

Histomorphometry of the proximal tibiae and the L4 vertebral bodies of 8-week old mice. Mean values ± SEM. \*\*p<0.01, \*\*\*p<0.001 vs. *Dmp1-Cre<sup>-/-</sup>;Tgif1<sup>fl/fl</sup>*.

Supplementary Table 5. Histomorphometric analysis of the proximal tibiae of *Tgif1*<sup>+/+</sup> and *Tgif1*<sup>-/-</sup> male mice after Scl-Ab treatment

| Parameters                                         | Male                                  |                                      |                                       |                                      |
|----------------------------------------------------|---------------------------------------|--------------------------------------|---------------------------------------|--------------------------------------|
|                                                    | <i>Tgif1</i> <sup>+/+</sup> , vehicle | <i>Tgif1</i> <sup>+/+</sup> , Scl-Ab | <i>Tgif1</i> <sup>-/-</sup> , vehicle | <i>Tgif1</i> <sup>-/-</sup> , Scl-Ab |
| BV/TV (%)                                          | 7.726 ± 0.894 (n=11)                  | 17.19 ± 1.35*** (n=9)                | 7.410 ± 0.678 (n=6)                   | 15.95 ± 1.46*** (n=8)                |
| Tb.Th (µm)                                         | 28.23 ± 1.98 (n=11)                   | 51.29 ± 3.32*** (n=9)                | 28.02 ± 1.62 (n=6)                    | 46.76 ± 1.50*** (n=8)                |
| Tb.Sp (µm)                                         | 355.1 ± 21.3 (n=11)                   | 258.0 ± 28.5 (n=9)                   | 357.9 ± 21.7 (n=6)                    | 270.2 ± 39.4 (n=8)                   |
| Tb.N (1/mm)                                        | 2.673 ± 0.126 (n=11)                  | 3.411 ± 0.235 (n=9)                  | 2.629 ± 0.140 (n=6)                   | 3.436 ± 0.322 (n=8)                  |
| MS/BS (%)                                          | 27.49 ± 2.36 (n=12)                   | 46.76 ± 2.80*** (n=9)                | 22.88 ± 3.52 (n=6)                    | 50.87 ± 3.88*** (n=8)                |
| MAR (µm/day)                                       | 1.697 ± 0.063 (n=12)                  | 2.124 ± 0.128** (n=9)                | 0.9904 ± 0.0668 (n=6)                 | 1.895 ± 0.115*** (n=8)               |
| BFR/BS<br>(µm <sup>3</sup> /µm <sup>2</sup> /year) | 169.5 ± 14.4 (n=12)                   | 356.4 ± 19.8*** (n=9)                | 83.83 ± 15.4 (n=6)                    | 347.6 ± 27.3*** (n=8)                |
| BFR/BV (%/year)                                    | 877.9 ± 92.8 (n=12)                   | 1138 ± 70.5 (n=9)                    | 443.5 ± 77.9 (n=6)                    | 1123 ± 77.1*** (n=8)                 |
| OV/BV (%)                                          | 1.546 ± 0.201 (n=8)                   | 4.307 ± 0.500*** (n=8)               | 0.6648 ± 0.0931 (n=6)                 | 2.685 ± 0.452*** (n=8)               |
| OS/BS (%)                                          | 9.834 ± 1.002 (n=8)                   | 30.77 ± 3.57*** (n=8)                | 5.134 ± 0.718 (n=6)                   | 22.51 ± 1.81*** (n=8)                |
| Ob.S/BS (%)                                        | 10.25 ± 1.06 (n=8)                    | 31.29 ± 3.32*** (n=8)                | 5.599 ± 1.009 (n=6)                   | 24.36 ± 1.73*** (n=8)                |
| N.Ob/BS (1/mm)                                     | 5.904 ± 0.560 (n=8)                   | 17.18 ± 1.67*** (n=8)                | 3.650 ± 0.720 (n=6)                   | 13.00 ± 1.31*** (n=8)                |
| ES/BS (%)                                          | 0.7151 ± 0.0708 (n=8)                 | 0.7905 ± 0.0565 (n=8)                | 0.3818 ± 0.0364 (n=6)                 | 0.4523 ± 0.0426 (n=8)                |
| Oc.S/BS (%)                                        | 0.6741 ± 0.0733 (n=8)                 | 0.7948 ± 0.0716 (n=8)                | 0.3203 ± 0.0300 (n=6)                 | 0.4719 ± 0.0506 (n=8)                |
| N.Oc/BS (1/mm)                                     | 0.2864 ± 0.0276 (n=8)                 | 0.3190 ± 0.0321 (n=8)                | 0.1418 ± 0.0116 (n=6)                 | 0.1890 ± 0.0216 (n=8)                |

Histomorphometry of the proximal tibiae of 12-week old mice. Mean values ± SEM. \*\*p<0.01, \*\*\*p<0.001 vs. vehicle control of the same genotype.

Supplementary Table 6. Histomorphometric analysis of the proximal tibiae of *Tgif1*<sup>+/+</sup> and *Tgif1*<sup>-/-</sup> male mice with *Lrp5*<sup>+G171V</sup> high bone mass mutation

| Parameters                                         | Male                                                     |                                                             |                                                          |                                                             |
|----------------------------------------------------|----------------------------------------------------------|-------------------------------------------------------------|----------------------------------------------------------|-------------------------------------------------------------|
|                                                    | <i>Lrp5</i> <sup>+/+</sup> ; <i>Tgif1</i> <sup>+/+</sup> | <i>Lrp5</i> <sup>+G171V</sup> ; <i>Tgif1</i> <sup>+/+</sup> | <i>Lrp5</i> <sup>+/+</sup> ; <i>Tgif1</i> <sup>-/-</sup> | <i>Lrp5</i> <sup>+G171V</sup> ; <i>Tgif1</i> <sup>-/-</sup> |
| BV/TV (%)                                          | 6.702 ± 0.867 (n=8)                                      | 16.40 ± 1.64*** (n=8)                                       | 6.195 ± 0.700 (n=8)                                      | 10.62 ± 1.13* (n=6)                                         |
| Tb.Th (µm)                                         | 29.97 ± 2.32 (n=8)                                       | 53.69 ± 3.54*** (n=8)                                       | 29.20 ± 1.66 (n=8)                                       | 40.30 ± 2.92** (n=6)                                        |
| Tb.Sp (µm)                                         | 408.5 ± 29.8 (n=8)                                       | 283.0 ± 20.4* (n=8)                                         | 469.8 ± 42.8 (n=8)                                       | 350.3 ± 27.7 (n=6)                                          |
| Tb.N (1/mm)                                        | 2.358 ± 0.147 (n=8)                                      | 3.038 ± 0.170* (n=8)                                        | 2.098 ± 0.165 (n=8)                                      | 2.622 ± 0.182 (n=6)                                         |
| MS/BS (%)                                          | 33.62 ± 1.62 (n=8)                                       | 44.63 ± 2.83** (n=8)                                        | 23.46 ± 1.83 (n=8)                                       | 39.74 ± 1.10*** (n=6)                                       |
| MAR (µm/day)                                       | 1.818 ± 0.149 (n=8)                                      | 2.639 ± 0.197** (n=8)                                       | 1.462 ± 0.149 (n=8)                                      | 2.512 ± 0.138*** (n=6)                                      |
| BFR/BS<br>(µm <sup>3</sup> /µm <sup>2</sup> /year) | 227.8 ± 29.2 (n=8)                                       | 441.2 ± 61.0** (n=8)                                        | 129.8 ± 23.4 (n=8)                                       | 365.1 ± 25.3** (n=6)                                        |
| BFR/BV (%/year)                                    | 1126 ± 104 (n=8)                                         | 1347 ± 140 (n=8)                                            | 776.6 ± 122.7 (n=8)                                      | 1709 ± 172*** (n=6)                                         |
| OV/BV (%)                                          | 2.278 ± 0.408 (n=8)                                      | 3.252 ± 0.405 (n=8)                                         | 1.109 ± 0.257 (n=8)                                      | 3.514 ± 0.422** (n=6)                                       |
| OS/BS (%)                                          | 13.55 ± 1.71 (n=8)                                       | 25.40 ± 2.04*** (n=8)                                       | 7.116 ± 1.175 (n=8)                                      | 21.43 ± 1.21*** (n=6)                                       |
| Ob.S/BS (%)                                        | 14.33 ± 1.71 (n=8)                                       | 25.99 ± 2.26*** (n=8)                                       | 8.672 ± 1.545 (n=8)                                      | 22.19 ± 1.28*** (n=6)                                       |
| N.Ob/BS (1/mm)                                     | 9.010 ± 0.950 (n=8)                                      | 16.14 ± 1.52*** (n=8)                                       | 5.512 ± 0.978 (n=8)                                      | 13.01 ± 0.92*** (n=6)                                       |
| ES/BS (%)                                          | 1.029 ± 0.071 (n=8)                                      | 1.153 ± 0.120 (n=8)                                         | 0.4937 ± 0.0703 (n=8)                                    | 0.6011 ± 0.0876 (n=6)                                       |
| Oc.S/BS (%)                                        | 0.9342 ± 0.0492 (n=8)                                    | 1.079 ± 0.108 (n=8)                                         | 0.4385 ± 0.0614 (n=8)                                    | 0.5242 ± 0.0862 (n=6)                                       |
| N.Oc/BS (1/mm)                                     | 0.3740 ± 0.0210 (n=8)                                    | 0.3933 ± 0.0506 (n=8)                                       | 0.2007 ± 0.0237 (n=8)                                    | 0.2125 ± 0.0363 (n=6)                                       |

Histomorphometry of the proximal tibiae of 8-week old mice. Mean values ± SEM. \*p<0.05, \*\*p<0.01, \*\*\*p<0.001 vs. group with the same *Tgif1* genotype.

Supplementary Table 7.  $\mu$ CT analysis of the distal and midshaft femura of *Tgif1*<sup>+/+</sup> and *Tgif1*<sup>-/-</sup> male mice with *Lrp5*<sup>+/A214V</sup> high bone mass mutation

|                |                                  | Male                                                     |                                                              |                                                          |                                                              |
|----------------|----------------------------------|----------------------------------------------------------|--------------------------------------------------------------|----------------------------------------------------------|--------------------------------------------------------------|
| Parameters     |                                  | <i>Lrp5</i> <sup>+/+</sup> ; <i>Tgif1</i> <sup>+/+</sup> | <i>Lrp5</i> <sup>+/A214V</sup> ; <i>Tgif1</i> <sup>+/+</sup> | <i>Lrp5</i> <sup>+/+</sup> ; <i>Tgif1</i> <sup>-/-</sup> | <i>Lrp5</i> <sup>+/A214V</sup> ; <i>Tgif1</i> <sup>-/-</sup> |
| Distal femur   | BV/TV (%)                        | 28.32 ± 6.28 (n=8)                                       | 54.13 ± 2.89** (n=9)                                         | 23.81 ± 6.05 (n=7)                                       | 43.74 ± 3.07** (n=7)                                         |
|                | Tb.Th (μm)                       | 52.00 ± 7.11 (n=8)                                       | 92.71 ± 6.94*** (n=9)                                        | 49.76 ± 9.07 (n=7)                                       | 74.84 ± 5.78 (n=7)                                           |
|                | Tb.Sp (μm)                       | 179.6 ± 42.4 (n=8)                                       | 77.34 ± 4.06 (n=9)                                           | 208.5 ± 53.5 (n=7)                                       | 95.94 ± 5.15 (n=7)                                           |
|                | Tb.N (1/mm)                      | 4.931 ± 0.581 (n=8)                                      | 5.244 ± 0.605 (n=9)                                          | 4.446 ± 0.533 (n=7)                                      | 5.862 ± 0.083 (n=7)                                          |
|                | SMI                              | 1.150 ± 0.658 (n=8)                                      | -1.950 ± 0.620** (n=9)                                       | 1.573 ± 0.633 (n=7)                                      | -0.263 ± 0.439 (n=7)                                         |
| Midshaft femur | Ct.Th (μm)                       | 188.1 ± 6.4 (n=8)                                        | 242.2 ± 4.0*** (n=9)                                         | 179.0 ± 11.0 (n=7)                                       | 231.4 ± 12.6*** (n=7)                                        |
|                | Ct.Dens (mg HA/cm <sup>3</sup> ) | 915.4 ± 62.3 (n=8)                                       | 1071 ± 12 (n=9)                                              | 927.1 ± 62.4 (n=7)                                       | 975.7 ± 19.4 (n=7)                                           |
|                | Ps.Dm (mm)                       | 1.858 ± 0.025 (n=8)                                      | 1.943 ± 0.029 (n=9)                                          | 1.798 ± 0.038 (n=7)                                      | 1.906 ± 0.054 (n=7)                                          |
|                | Ps.Pm (mm)                       | 5.835 ± 0.079 (n=8)                                      | 6.101 ± 0.091 (n=9)                                          | 5.645 ± 0.120 (n=7)                                      | 5.986 ± 0.170 (n=7)                                          |
|                | Ec.Dm (mm)                       | 1.565 ± 0.024 (n=8)                                      | 1.568 ± 0.024 (n=9)                                          | 1.526 ± 0.027 (n=7)                                      | 1.551 ± 0.040 (n=7)                                          |
|                | Ec.Pm (mm)                       | 4.913 ± 0.076 (n=8)                                      | 4.923 ± 0.074 (n=9)                                          | 4.792 ± 0.085 (n=7)                                      | 4.872 ± 0.126 (n=7)                                          |

$\mu$ CT analysis of the distal femura of 8-week old mice. BV/TV, bone volume/total volume; Tb.Th, trabecular thickness; Tb.Sp, trabecular separation; Tb.N, trabecular number; SMI, structure model index; Ct.Th, cortical thickness; Ct.Dens, cortical density; Ps.Dm, periosteal diameter; Ps.Pm, periosteal perimeter; Ec.Dm, endocortical diameter; Ec.Pm, endocortical perimeter. Mean values ± SEM. \*\*p<0.01, \*\*\*p<0.001 vs. group with the same *Tgif1* genotype.

Supplementary Table 8. Histomorphometric analysis of the proximal tibiae of *Tgif1*<sup>+/+</sup> and *Tgif1*<sup>-/-</sup> male mice after anabolic PTH treatment

|                |                                                    | Male                                  |                                   |                                       |                                   |
|----------------|----------------------------------------------------|---------------------------------------|-----------------------------------|---------------------------------------|-----------------------------------|
| Parameters     |                                                    | <i>Tgif1</i> <sup>+/+</sup> , vehicle | <i>Tgif1</i> <sup>+/+</sup> , PTH | <i>Tgif1</i> <sup>-/-</sup> , vehicle | <i>Tgif1</i> <sup>-/-</sup> , PTH |
| Proximal tibia | BV/TV (%)                                          | 9.649 ± 0.718 (n=8)                   | 15.14 ± 1.13*** (n=9)             | 8.589 ± 0.632 (n=8)                   | 7.632 ± 0.476 (n=8)               |
|                | Tb.Th (µm)                                         | 38.69 ± 2.28 (n=8)                    | 53.13 ± 2.85*** (n=9)             | 35.67 ± 1.72 (n=8)                    | 38.33 ± 1.45 (n=8)                |
|                | Tb.Sp (µm)                                         | 371.4 ± 25.6 (n=8)                    | 307.0 ± 20.8* (n=9)               | 388.8 ± 22.4 (n=8)                    | 456.6 ± 16.3* (n=8)               |
|                | Tb.N (1/mm)                                        | 2.507 ± 0.159 (n=8)                   | 2.843 ± 0.149 (n=9)               | 2.399 ± 0.120 (n=8)                   | 2.036 ± 0.071 (n=8)               |
|                | MS/BS (%)                                          | 28.35 ± 1.87 (n=8)                    | 43.08 ± 1.19*** (n=9)             | 22.36 ± 1.63 (n=8)                    | 24.16 ± 0.62 (n=8)                |
|                | MAR (µm/day)                                       | 1.606 ± 0.086 (n=8)                   | 2.794 ± 0.123*** (n=9)            | 1.048 ± 0.037 (n=8)                   | 1.699 ± 0.069*** (n=8)            |
|                | BFR/BS<br>(µm <sup>3</sup> /µm <sup>2</sup> /year) | 166.4 ± 14.9 (n=8)                    | 440.8 ± 26.0*** (n=9)             | 86.12 ± 8.02 (n=8)                    | 149.3 ± 5.8* (n=8)                |
|                | BFR/BV (%/year)                                    | 860.3 ± 59.4 (n=8)                    | 1664 ± 60.1*** (n=9)              | 502.6 ± 68.4 (n=8)                    | 782.5 ± 29.5** (n=8)              |
|                | OV/BV (%)                                          | 3.285 ± 0.558 (n=8)                   | 6.998 ± 0.397*** (n=9)            | 0.8817 ± 0.0815 (n=8)                 | 1.983 ± 0.374 (n=8)               |
|                | OS/BS (%)                                          | 18.53 ± 2.09 (n=8)                    | 47.30 ± 1.90*** (n=9)             | 6.286 ± 0.515 (n=8)                   | 15.36 ± 2.48** (n=8)              |
|                | Ob.S/BS (%)                                        | 19.29 ± 1.90 (n=8)                    | 48.92 ± 2.27*** (n=9)             | 8.008 ± 0.935 (n=8)                   | 17.70 ± 2.89** (n=8)              |
|                | N.Ob/BS (1/mm)                                     | 11.38 ± 0.99 (n=8)                    | 30.29 ± 1.35*** (n=9)             | 4.592 ± 0.648 (n=8)                   | 11.03 ± 1.82** (n=8)              |
|                | ES/BS (%)                                          | 0.7615 ± 0.0744 (n=8)                 | 1.379 ± 0.103*** (n=9)            | 0.3329 ± 0.0210 (n=8)                 | 0.5862 ± 0.0511* (n=8)            |
|                | Oc.S/BS (%)                                        | 0.6730 ± 0.0497 (n=8)                 | 1.375 ± 0.122*** (n=9)            | 0.3130 ± 0.0239 (n=8)                 | 0.5312 ± 0.0526 (n=8)             |
|                | N.Oc/BS (1/mm)                                     | 0.2768 ± 0.0189 (n=8)                 | 0.5396 ± 0.0375*** (n=9)          | 0.1446 ± 0.0103 (n=8)                 | 0.2439 ± 0.0226* (n=8)            |

Histomorphometry of the proximal tibiae of 12-week old mice. Mean values ± SEM. \*p<0.05, \*\*p<0.01, \*\*\*p<0.001 vs. vehicle control of the same genotype.

Supplementary Table 9. Histomorphometric analysis of the proximal tibiae of *Dmp1-Cre<sup>-/-</sup>;Tgif1<sup>fl/fl</sup>* and *Dmp1-Cre<sup>Tg</sup>;Tgif1<sup>fl/fl</sup>* male mice after anabolic PTH treatment

| Parameters                                         | Male                                                             |                                                              |                                                                 |                                                             |
|----------------------------------------------------|------------------------------------------------------------------|--------------------------------------------------------------|-----------------------------------------------------------------|-------------------------------------------------------------|
|                                                    | <i>Dmp1-Cre<sup>-/-</sup>;Tgif1<sup>fl/fl</sup></i> ,<br>vehicle | <i>Dmp1-Cre<sup>-/-</sup>;Tgif1<sup>fl/fl</sup></i> ,<br>PTH | <i>Dmp1-Cre<sup>Tg</sup>;Tgif1<sup>fl/fl</sup></i> ,<br>vehicle | <i>Dmp1-Cre<sup>Tg</sup>;Tgif1<sup>fl/fl</sup></i> ,<br>PTH |
| BV/TV (%)                                          | 10.78 ± 0.94 (n=8)                                               | 18.69 ± 2.28** (n=8)                                         | 10.30 ± 1.10 (n=8)                                              | 11.68 ± 0.73 (n=8)                                          |
| Tb.Th (µm)                                         | 39.37 ± 2.68 (n=8)                                               | 48.49 ± 4.38 (n=8)                                           | 37.88 ± 2.51 (n=8)                                              | 44.37 ± 2.75 (n=8)                                          |
| Tb.Sp (µm)                                         | 331.5 ± 15.3 (n=8)                                               | 222.1 ± 20.2** (n=8)                                         | 350.1 ± 31.4 (n=8)                                              | 340.4 ± 20.81 (n=8)                                         |
| Tb.N (1/mm)                                        | 2.726 ± 0.109 (n=8)                                              | 3.820 ± 0.257*** (n=8)                                       | 2.674 ± 0.185 (n=8)                                             | 2.658 ± 0.150 (n=8)                                         |
| MS/BS (%)                                          | 29.26 ± 2.41 (n=8)                                               | 38.86 ± 2.51** (n=8)                                         | 20.09 ± 1.45 (n=8)                                              | 24.39 ± 2.39 (n=8)                                          |
| MAR (µm/day)                                       | 1.512 ± 0.106 (n=8)                                              | 2.598 ± 0.130*** (n=8)                                       | 1.348 ± 0.071 (n=8)                                             | 1.511 ± 0.162 (n=8)                                         |
| BFR/BS<br>(µm <sup>3</sup> /µm <sup>2</sup> /year) | 166.1 ± 23.7 (n=8)                                               | 366.6 ± 25.4*** (n=8)                                        | 97.92 ± 7.55 (n=8)                                              | 140.6 ± 28.4 (n=8)                                          |
| BFR/BV (%/year)                                    | 829.5 ± 63.2 (n=8)                                               | 1603 ± 37.9*** (n=8)                                         | 538.2 ± 52.2 (n=8)                                              | 737.7 ± 103.0* (n=8)                                        |
| OV/BV (%)                                          | 2.485 ± 0.226 (n=8)                                              | 7.972 ± 1.043*** (n=8)                                       | 0.6901 ± 0.0897 (n=8)                                           | 2.300 ± 0.449* (n=8)                                        |
| OS/BS (%)                                          | 15.83 ± 1.20 (n=8)                                               | 44.41 ± 4.64*** (n=8)                                        | 5.728 ± 0.766 (n=8)                                             | 15.54 ± 2.20* (n=8)                                         |
| Ob.S/BS (%)                                        | 16.56 ± 1.07 (n=8)                                               | 45.61 ± 4.80*** (n=8)                                        | 6.770 ± 0.843 (n=8)                                             | 17.77 ± 2.53* (n=8)                                         |
| N.Ob/BS (1/mm)                                     | 10.49 ± 0.62 (n=8)                                               | 30.65 ± 3.45*** (n=8)                                        | 4.505 ± 0.583 (n=8)                                             | 10.49 ± 1.43 (n=8)                                          |
| ES/BS (%)                                          | 0.7816 ± 0.0959 (n=8)                                            | 1.477 ± 0.166*** (n=8)                                       | 0.3506 ± 0.0342 (n=8)                                           | 0.7795 ± 0.0643** (n=8)                                     |
| Oc.S/BS (%)                                        | 0.7378 ± 0.0800 (n=8)                                            | 1.396 ± 0.179*** (n=8)                                       | 0.3563 ± 0.0393 (n=8)                                           | 0.7402 ± 0.0678* (n=8)                                      |
| N.Oc/BS (1/mm)                                     | 0.3045 ± 0.0322 (n=8)                                            | 0.5532 ± 0.0901** (n=8)                                      | 0.1651 ± 0.0128 (n=8)                                           | 0.3371 ± 0.0302 (n=8)                                       |

Histomorphometry of the proximal tibiae of 12-week old mice. Mean values ± SEM. \*p<0.05, \*\*p<0.01, \*\*\*p<0.001 vs. vehicle control of the same genotype.



Supplementary Table 10. Primer sequences

| Primer name      | Forward primer          | Reverse primer             |
|------------------|-------------------------|----------------------------|
| Alp              | CCTCAAAGGCTTCTTCTTGCTG  | GGGGTGTATCCACCGAATGTG      |
| Ocn              | CACTCTGCTGACCCTGGCTGC   | CAGGGTTAAGCTCACACTGCTCC    |
| Sema3E           | GGGGCAGATGTCCTTTTGA     | AGTCCAGCAAACAGCTCATTC      |
| BAT-GAL          | TTGAAAATGGTCTGCTGCTG    | TATTGGCTTCATCCACCACA       |
| CyclinD1         | CGTGGCCTCTAAGATGAAGGA   | TTG TTC TCA TCC GCC TCT GG |
| Axin2            | GCAGCAGATCCGGGAGGATGAA  | GATTGACAGCCGGGGTCTTGA      |
| Tgif1            | GCAGACACACCTGTCCACACTA  | GGAATGAAATGGGCTCTCTTCT     |
| Tgif2            | CAGACCAACCTCTCGGTGCTG   | GCACACAGACAAGGCGAGCATG     |
| Dkk1             | CGAACAAGTACCGACTCT      | GTCAGAGGGCATGCATACC        |
| Sost             | GAGAACAACCAGACCATGAAC   | GCT CGC GGC AGC TGT ACT    |
| Rankl            | AACTGCAACACATTGTGGGC    | TTATGGGAACCCGATGGGATGC     |
| Opg              | AAGAGCAAACCTTCCAGCTGC   | CACGCTGCTTTCACAGAGGTC      |
| Eph2B            | CAGACCAGCATCAAGGAAAAG   | ATGTGTCCGCTGGTGTAGTG       |
| Eph4B            | CACCCAGCAGCTTGATCCTG    | ACCAGGACCACACCCACAAC       |
| Ephrin2B         | GTGCCAGACAAGAGCCATGAA   | GGTGTAGAACCTGGATTTGG       |
| IL-1             | GACCTTCCAGGATGAGGACA    | AGGCCACAGGTATTTTGTCTG      |
| IL-6             | GAGCCCACCAAGAACGATAG    | GGTTGTCACCAGCATCAGTC       |
| IL-11            | CGGCAACTAGCTGCACAGATG   | CTCCAGAGTCTTTAGGGAAGG      |
| IL-18            | CCAGCATCAGGACAAAGAAA    | TACAGTGAAGTCGGCCAAAG       |
| IGF-1            | ACAGGCTATGGCTCCAGCAT    | GCTCCGGAAGCAACACTCAT       |
| IGF-2            | CACGCTTCACTTTGTCTGTTCCG | CAGCACTCTTCCACGATGCCAC     |
| Igfbp-2          | CCAAGAAGCTGCGACCAC      | GGGATGTGCAGGGAGTAGAG       |
| Igfbp-3          | GAGTGTGGAAAGCCAGGTTGTC  | GGCATGGAGTGGATGGAAC        |
| Igfbp-5          | TCTAGCCATCCACACTGCTG    | AAGAAAGCAAAGCGTTGGAA       |
| Gapdh            | TGCACCACCAACTGCTTAG     | GGATGCAGGGATGATTGGC        |
| Tbp              | GCTCTGGAATTGTACCGCAGC   | CTCTTGGCTCCTGTGCACAC       |
| Binding site 1   | AGAGCAGCTGCATTGATGTG    | CGCTGTGGTATGCTAACTGG       |
| Binding site 2   | TAGATCACCCCAACAATGG     | CACCCACACATCAATGCAG        |
| Binding site 3   | CTGTGAAAAGGCAGGGCTAC    | ATCAAGCGAGCAGAGAGTGG       |
| Binding site 4   | GGTGGTGTGCACCTATAGCC    | CGAGGCCGCTCACTATAAAC       |
| Binding site 5   | CTGAGAGCTGGGGTGAGTG     | TGAAACAGGGTCTCATGCAC       |
| Binding site 6   | TTTTTCTCTGCCAGCGTTAG    | AGAGGCTAACTTTTCTTTTCTC     |
| Binding site 7   | AAATTGTGGCTCCCCAGT      | TGTCCTGTGGCTGTCCTATG       |
| Binding site 8   | TTAGTTTCCAAGCGGCTCTC    | GCCCAGATGTTTTTGGTTTG       |
| Binding site 9   | AGAGGCAGGAGAAGCAGACC    | AGGATGACCAGCCCTATGTG       |
| Binding site 10  | CTGTTCTGGTCCCTCACAGC    | TCTGGGAAAAATGGATTTGC       |
| Binding site 11  | TGGACGTCAAGTCTGCTCTG    | CTCTGCAAAAGAGGCTGTGG       |
| Rar alpha        | GGGAGTTTTTAAGCGCTGTGAG  | GGAGCAGCTCACTTCTACC        |
| Negative control | GAAATTCTGTGTTGGCCGCA    | TCAGCACCTACAATTCTGACCA     |
