# Supplementary material for: TG-interacting factor 1 (Tgif1)-deficiency attenuates bone remodeling and blunts the anabolic response to parathyroid hormone
Source: PubMed Central journal article supplement (PMC6430773; doi:10.1038/s41467-019-08778-x), 2019-03-22
Supplement: 41467_2019_8778_MOESM4_ESM.pdf [file 41467_2019_8778_MOESM4_ESM.pdf]

**Figure 2f**

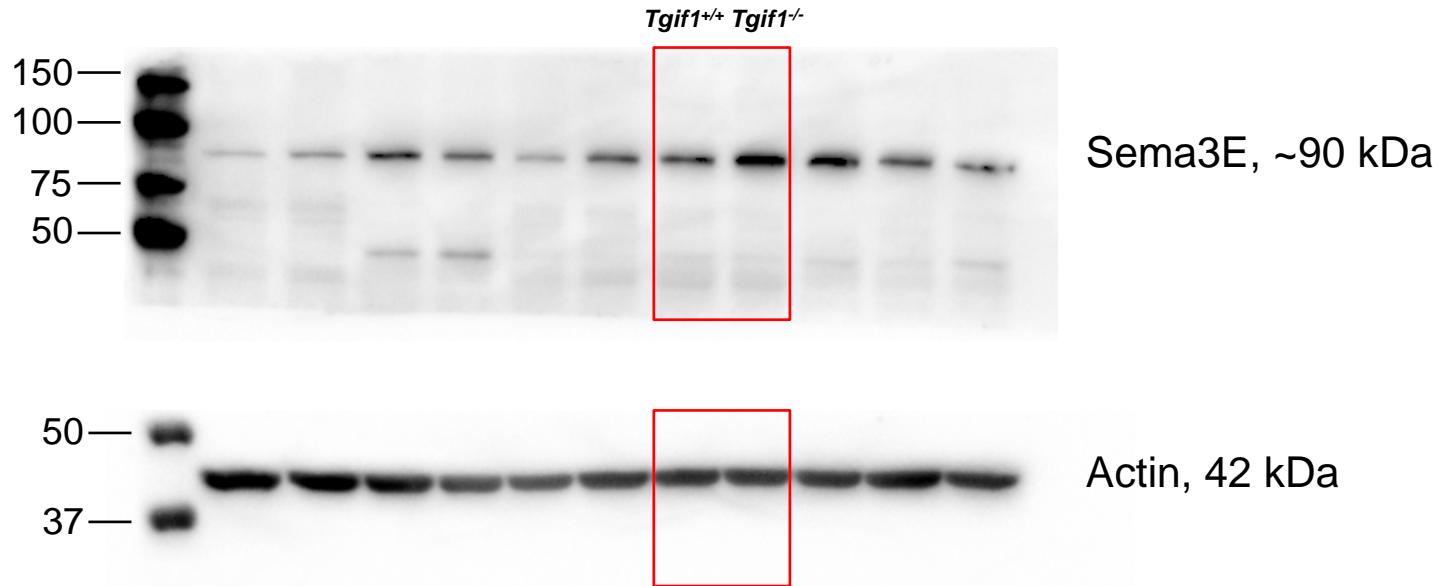

**Source data to Fig. 2f** Uncropped immunoblot of Semaphorin 3E (Sema3E) protein expression in calvarial osteoblasts obtained from *Tgif1*<sup>+/+</sup> and *Tgif1*<sup>-/-</sup> mice. Immunoblot for actin was used as a loading control. Molecular weight in kilo Dalton (kDa) is indicated.

**Figure 3a**

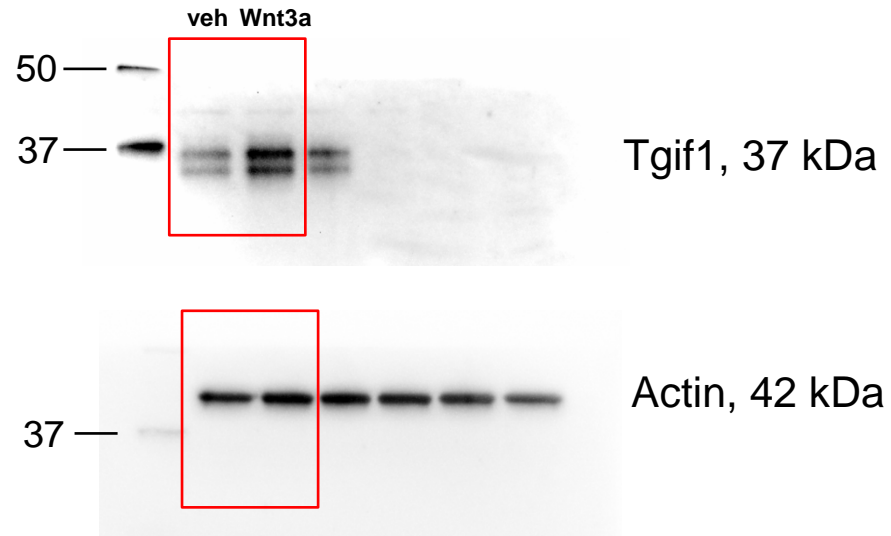

**Source data to Fig. 3a** Uncropped immunoblot of Tgif1 protein expression in wild-type calvarial osteoblasts after stimulation with recombinant Wnt3a or vehicle (veh) for 4 hours. Immunoblot for actin was used as a loading control. Molecular weight in kilo Dalton (kDa) is indicated.

**Figure 5a**

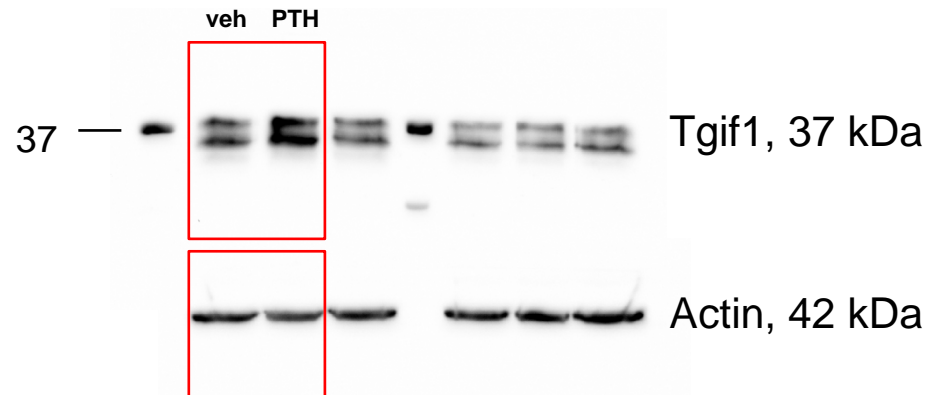

**Source data to Fig. 5a** Uncropped immunoblot of Tgif1 expression in osteoblasts upon PTH or vehicle (veh) treatment. Immunoblot for actin was used as a loading control. Molecular weight in kilo Dalton (kDa) is indicated.

**Figure 5e**

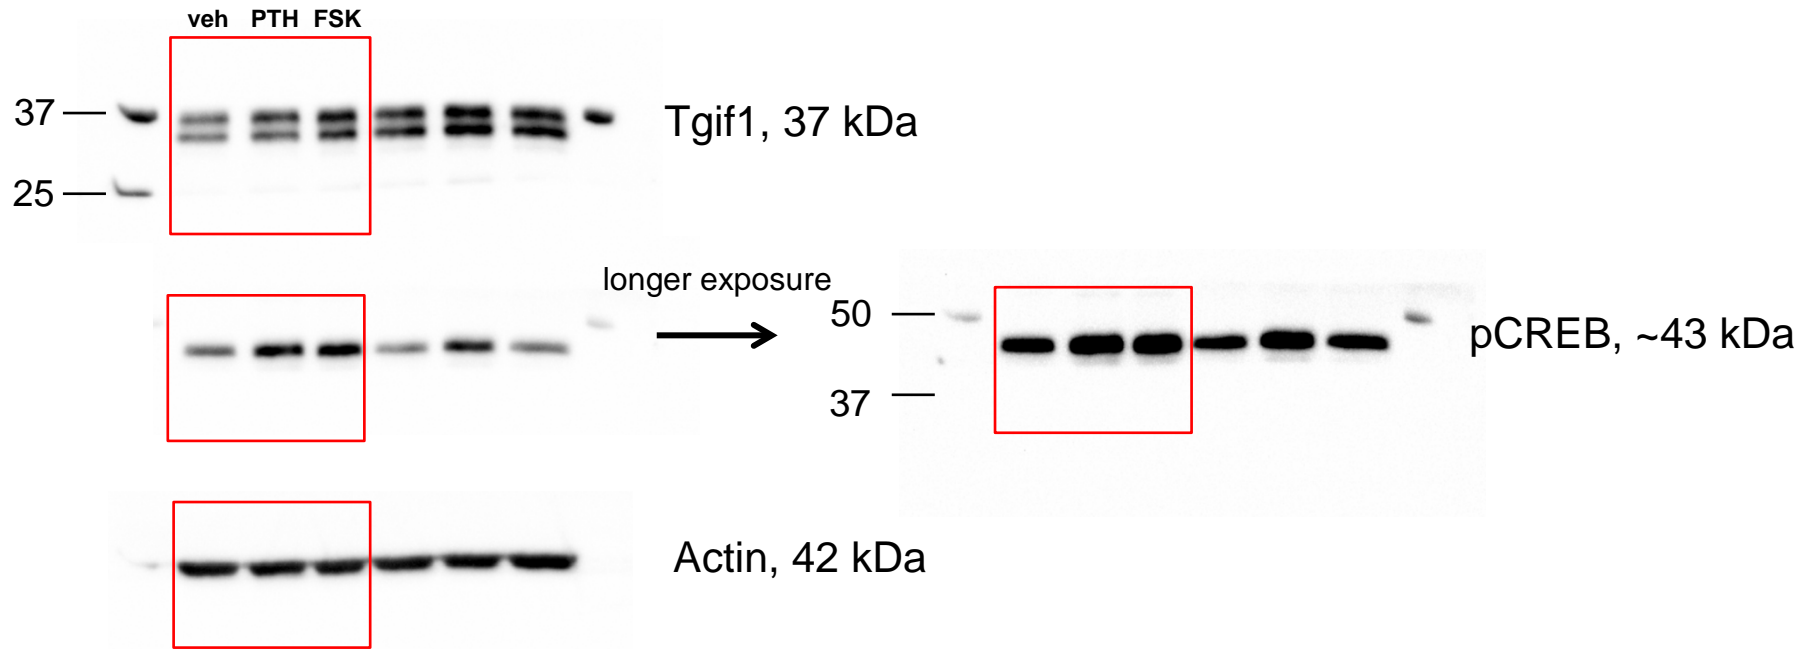

**Source data to Fig. 5e** Uncropped immunoblot of Tgif1 and pCREB in osteoblasts after stimulation with PTH, Forskolin (FSK) or vehicle (veh). A longer exposure of the immunoblot showing the abundance of pCREB is shown on the right. Immunoblot for actin was used as a loading control. Molecular weight in kilo Dalton (kDa) is indicated.

**Figure 7e**

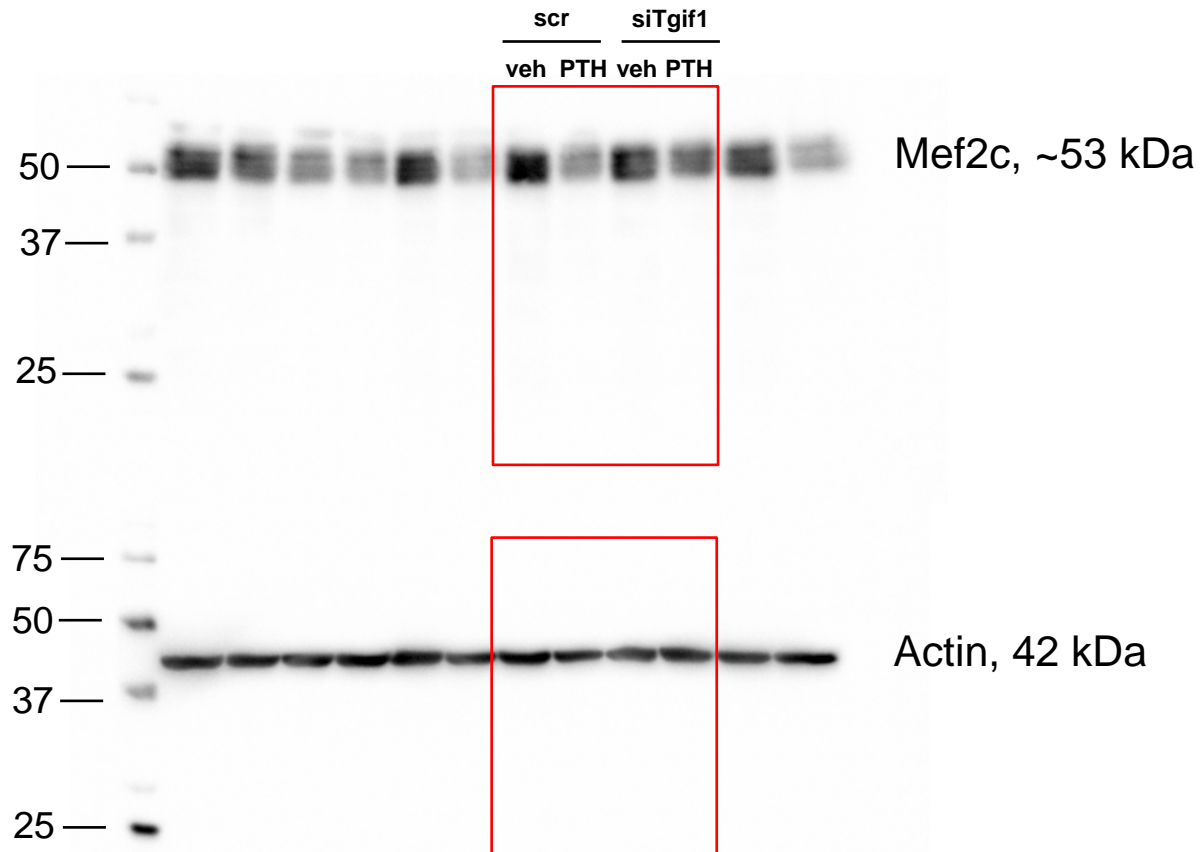

**Source data to Fig. 7e** Uncropped immunoblot demonstrating the protein abundance of Mef2c in UMR-106 cells. Cells were transfected with scrambled (scr) control siRNA or siRNA targeting Tgif1 (siTgif1). After 48 hours, cells were stimulated with PTH or vehicle (veh) for 8 hours. Immunoblot for actin was used as a loading control. Molecular weight in kilo Dalton (kDa) is indicated.
